# Supplementary material for: The Role of Molossidae and Vespertilionidae in Shaping the Diversity of Alphacoronaviruses in the Americas
Source: PubMed Central journal article supplement (PMC9769993; doi:10.1128/spectrum.03143-22), 2022-10-12
Supplement: spectrum.03143-22-s0001.pdf [file spectrum.03143-22-s0001.pdf]

| Sample ID | Host                         | Clade | Country   | Province     | Locality    | Latitude | Longitude | Collection Date | ACCN     |
|-----------|------------------------------|-------|-----------|--------------|-------------|----------|-----------|-----------------|----------|
| A488 20   | <i>Molossus molossus</i>     | A     | Argentina | Buenos Aires | Berazategui | -34.77   | -58.21    | 2020            | OP169153 |
| P176 20   | <i>Tadarida brasiliensis</i> | A     | Argentina | CABA         | CABA        | -34.60   | -58.45    | 2020            | OP169160 |
| P197 20   | <i>Tadarida brasiliensis</i> | A     | Argentina | CABA         | CABA        | -34.60   | -58.45    | 2020            | OP169162 |
| P364 21   | <i>Tadarida brasiliensis</i> | A     | Argentina | Chubut       | Trelew      | -43.25   | -65.31    | 2021            | OP169165 |
| P534 20   | <i>Molossus molossus</i>     | B     | Argentina | Buenos Aires | Moreno      | -34.63   | -58.79    | 2020            | OP169167 |
| P164 20   | <i>Molossus</i> spp.         | B     | Argentina | CABA         | CABA        | -34.60   | -58.45    | 2020            | OP169159 |
| P205 20   | <i>Molossus</i> spp.         | B     | Argentina | CABA         | CABA        | -34.60   | -58.45    | 2020            | OP169163 |
| A479 20   | <i>Myotis</i> spp.           | B     | Argentina | Buenos Aires | San Isidro  | -34.47   | -58.53    | 2020            | OP169152 |
| P207 20   | <i>Myotis</i> spp.           | B     | Argentina | Neuquén      | Neuquén     | -38.95   | -68.06    | 2020            | OP169164 |
| A379 20   | <i>Tadarida brasiliensis</i> | B     | Argentina | Buenos Aires | Balcarce    | -37.85   | -58.26    | 2020            | OP169150 |
| A415 20   | <i>Tadarida brasiliensis</i> | B     | Argentina | Buenos Aires | Merlo       | -34.67   | -58.73    | 2020            | OP169151 |
| A533 20   | <i>Tadarida brasiliensis</i> | B     | Argentina | Buenos Aires | Moron       | 34.58    | -58.62    | 2020            | OP169154 |
| A637 20   | <i>Tadarida brasiliensis</i> | B     | Argentina | Buenos Aires | San Martin  | -34.43   | -58.54    | 2020            | OP169155 |
| P196 20   | <i>Tadarida brasiliensis</i> | B     | Argentina | CABA         | CABA        | -34.60   | -58.45    | 2020            | OP169161 |
| P507 20   | <i>Tadarida brasiliensis</i> | B     | Argentina | CABA         | CABA        | -34.60   | -58.45    | 2020            | OP169166 |
| P111 21   | <i>Tadarida brasiliensis</i> | B     | Argentina | CABA         | CABA        | -34.60   | -58.45    | 2021            | OP169156 |
| P113 21   | <i>Tadarida brasiliensis</i> | B     | Argentina | CABA         | CABA        | -34.60   | -58.45    | 2021            | OP169157 |
| P552 20   | <i>Tadarida brasiliensis</i> | B     | Argentina | La Pampa     | Santa Rosa  | -36.62   | -64.28    | 2020            | OP169168 |
| P125 20   | <i>Tadarida brasiliensis</i> | B     | Argentina | ND           | ND          | ND       | ND        | 2020            | OP169158 |
| P919 20   | <i>Tadarida brasiliensis</i> | B     | Argentina | Neuquén      | Neuquén     | -38.95   | -68.06    | 2020            | OP169169 |
| P934 20   | <i>Tadarida brasiliensis</i> | B     | Argentina | Río Negro    | Las Grutas  | -40.73   | -64.93    | 2020            | OP169170 |

**Supplementary Table S1.** Sample ID, host, clade, country, state, locality, latitude, longitude, and Genbank accession numbers of the alphaCoV sequences produced in this study. CABA: Ciudad Autónoma de Buenos Aires

**Supplementary Table S2.** Sample ID, host, taxonomy, country, and Genbank accession numbers of the CoV sequences retrieved from Genbank and used in this study.

| <b>ACCN</b> | <b>Taxonomy</b>  | <b>Host</b>               | <b>Country</b> | <b>Collection date</b> |
|-------------|------------------|---------------------------|----------------|------------------------|
| NC_022103   | Alphacoronavirus | Myotis lucifugus          | USA            | 2006                   |
| NC_048216   | Alphacoronavirus | Trienops afer             | Kenya          | 2010                   |
| NC_046964   | Alphacoronavirus | Pipistrellus kuhlii       | Italy          | 2015                   |
| NC_032107   | Alphacoronavirus | Trienops afer             | Kenya          | 2010                   |
| NC_028833   | Alphacoronavirus | Nyctalus velutinus        | China          | 2013                   |
| NC_028824   | Alphacoronavirus | Rhinolophus ferrumequinum | China          | 2012                   |
| NC_028814   | Alphacoronavirus | Rhinolophus ferrumequinum | China          | 2013                   |
| NC_028811   | Alphacoronavirus | Myotis ricketti           | China          | 2011                   |
| NC_032730   | Alphacoronavirus | Rattus norvegicus         | China          | 2013                   |
| NC_018871   | Alphacoronavirus | Rousettus leschenaulti    | China          | 2005                   |
| NC_025217   | Betacoronavirus  | Hipposideros pratti       | China          | 2013                   |
| NC_030886   | Betacoronavirus  | Rousettus leschenaulti    | China          | 2014                   |
| MN996532    | Betacoronavirus  | Rhinolophus affinis       | China          | 2013                   |
| NC_034440   | unclassified     | Pipistrellus hesperidus   | Uganda         | 2013                   |
| NC_014470   | unclassified     | Rhinolophus blasii        | Bulgaria       | 2008                   |
| NC_010438   | unclassified     | Miniopterus               | China          | -                      |
| NC_010437   | unclassified     | Miniopterus               | China          | -                      |
| NC_009988   | unclassified     | Rhinolophus               | -              | -                      |
| NC_009021   | unclassified     | Pipistrellus              | China          |                        |
| NC_009020   | unclassified     | Pipistrellus              | China          |                        |
| NC_009019   | unclassified     | Tylonycteris              | China          |                        |
| NC_009657   | unclassified     | Scotophilus               | -              | -                      |
| NC_005831   | Alphacoronavirus | Homo sapiens              | -              | -                      |
| NC_002645   | Alphacoronavirus | Homo sapiens              | -              | -                      |
| NC_045512   | Betacoronavirus  | Homo sapiens              | China          | 2019                   |
| NC_006213   | Betacoronavirus  | Homo sapiens              | USA            | -                      |
| NC_038294   | Betacoronavirus  | Homo sapiens              | United Kingdom | 2012                   |
| NC_019843   | Betacoronavirus  | Homo sapiens              | -              | 2012                   |
| NC_006577   | Betacoronavirus  | Homo sapiens              | -              | -                      |
| NC_004718   | Betacoronavirus  | Homo sapiens              | Canada         | -                      |
| NC_034972   | Alphacoronavirus | Apodemus chevrieri        | China          | 2011                   |
| NC_028752   | Alphacoronavirus | camel                     | Saudi Arabia   | 2015                   |
| MT121216    | Betacoronavirus  | Manis javanica            | China          | 2019                   |
| MT040336    | Betacoronavirus  | Manis javanica            | China          | 2017                   |
| NC_039207   | Betacoronavirus  | Erinaceus europaeus       | Germany        | 2012                   |
| NC_026011   | Betacoronavirus  | Rattus norvegicus         | China          | 2012                   |
| NC_017083   | Betacoronavirus  | Oryctolagus cuniculus     | China          | 2006                   |
| NC_012936   | Betacoronavirus  | rat                       | -              | -                      |
| NC_003045   | Betacoronavirus  | bovine                    | -              | -                      |
| KX432213    | Betacoronavirus  | dog                       | China          | 2014                   |
| JX860640    | Betacoronavirus  | dog                       | South Korea    | 2008                   |
| NC_010646   | Gammacoronavirus | Delphinapterus leucas     | -              | -                      |
| NC_038861   | Alphacoronavirus | pig                       | USA            | -                      |
| NC_030292   | Alphacoronavirus | Mustela putorius          | Netherlands    | 2010                   |
| NC_028806   | Alphacoronavirus | pig                       | Italy          | 2009                   |
| NC_023760   | Alphacoronavirus | Mustela vison             | USA            | 1998                   |

|           |                  |                        |            |   |        |
|-----------|------------------|------------------------|------------|---|--------|
| NC_002306 | Alphacoronavirus | feline                 | USA        | - |        |
| NC_003436 | Alphacoronavirus | pig                    | -          | - |        |
| NC_039208 | Deltacoronavirus | pig                    | China      |   | 2010   |
| NC_010800 | Gammacoronavirus | turkey                 | Canada     | - |        |
| NC_048214 | Gammacoronavirus | duck                   | China      |   | 2014   |
| NC_048213 | Gammacoronavirus | chicken                | India      |   | 2003   |
| NC_046965 | Gammacoronavirus | Branta canadensis      | Canada     |   | 2017   |
| NC_001451 | Gammacoronavirus | bird                   | -          | - |        |
| NC_011547 | Deltacoronavirus | red-whiskered bulbul   | Hong Kong  |   | 2007   |
| NC_016992 | Deltacoronavirus | sparrow                | China      |   | 2007   |
| NC_016991 | Deltacoronavirus | white-eye              | China      |   | 2007   |
| NC_016996 | Deltacoronavirus | common moorhen         | China      |   | 2007   |
| NC_016995 | Deltacoronavirus | wigeon                 | China      |   | 2008   |
| NC_016994 | Deltacoronavirus | night-heron            | China      |   | 2007   |
| NC_016993 | Deltacoronavirus | maggie-robin           | China      |   | 2007   |
| NC_011550 | Deltacoronavirus | white-rumped munia     | China      |   | Apr-07 |
| NC_011549 | Deltacoronavirus | grey-backed thrush     | China      |   | Jan-07 |
| NC_001846 | Betacoronavirus  | mouse                  | -          | - |        |
| NC_048217 | Betacoronavirus  | mouse                  | -          | - |        |
| AC_000192 | Betacoronavirus  | mouse                  | -          | - |        |
| JX537914  | Alphacoronavirus | Eptesicus fuscus       | USA        |   | 2009   |
| JQ731793  | Alphacoronavirus | Carollia perspicillata | Costa Rica |   | 2010   |
| JQ731792  | Alphacoronavirus | Carollia perspicillata | Costa Rica |   | 2010   |
| JQ731784  | Alphacoronavirus | Artibeus jamaicensis   | Panama     |   | 2010   |
| JQ731788  | Alphacoronavirus | Artibeus lituratus     | Panama     |   | 2011   |
| EF544564  | Alphacoronavirus | Myotis occultus        | USA        |   | 2006   |
| KY820805  | Alphacoronavirus | Myotis lucifugus       | Canada     |   | 2010   |
| KY820799  | Alphacoronavirus | Myotis lucifugus       | Canada     |   | 2010   |
| KY820784  | Alphacoronavirus | Myotis lucifugus       | Canada     |   | 2010   |
| KY799179  | Alphacoronavirus | Myotis lucifugus       | Canada     |   | 2010   |
| JX537913  | Alphacoronavirus | Perimyotis subflavus   | USA        |   | 2010   |
| JQ731789  | Alphacoronavirus | Carollia perspicillata | Costa Rica |   | 2010   |
| JQ731776  | Alphacoronavirus | Anoura geoffroyi       | Costa Rica |   | 2010   |
| JQ731783  | Alphacoronavirus | Phyllostomus discolor  | Panama     |   | 2011   |
| JQ731785  | Alphacoronavirus | Artibeus jamaicensis   | Panama     |   | 2010   |
| KM215146  | Alphacoronavirus | Glossophaga soricina   | Costa Rica |   | 2014   |
| EF544563  | Alphacoronavirus | Myotis occultus        | USA        |   | 2006   |
| KY820806  | Alphacoronavirus | Myotis lucifugus       | Canada     |   | 2010   |
| KY820792  | Alphacoronavirus | Myotis lucifugus       | Canada     |   | 2010   |
| KY820782  | Alphacoronavirus | Myotis lucifugus       | Canada     |   | 2010   |
| KY820777  | Alphacoronavirus | Myotis lucifugus       | Canada     |   | 2010   |
| KY820775  | Alphacoronavirus | Myotis lucifugus       | Canada     |   | 2010   |
| OL415261  | Alphacoronavirus | Eptesicus fuscus       | USA        |   | 2020   |
| JQ731782  | Alphacoronavirus | Phyllostomus discolor  | Panama     |   | 2011   |
| KC779225  | Alphacoronavirus | Carollia perspicillata | Costa Rica |   | 2012   |
| EF544565  | Alphacoronavirus | Myotis occultus        | USA        |   | 2006   |
| KY820803  | Alphacoronavirus | Myotis lucifugus       | Canada     |   | 2010   |
| KY820793  | Alphacoronavirus | Myotis lucifugus       | Canada     |   | 2010   |
| KY820769  | Alphacoronavirus | Myotis lucifugus       | Canada     |   | 2010   |
| JQ731801  | Alphacoronavirus | Carollia perspicillata | Costa Rica |   | 2010   |
| JQ731790  | Alphacoronavirus | Carollia perspicillata | Costa Rica |   | 2010   |

|          |                  |                        |            |      |
|----------|------------------|------------------------|------------|------|
| HQ336976 | Alphacoronavirus | Myotis volans          | USA        | 2007 |
| HQ336975 | Alphacoronavirus | Myotis volans          | USA        | 2009 |
| EF544567 | Alphacoronavirus | Myotis occultus        | USA        | 2006 |
| KX663833 | Alphacoronavirus | Tadarida brasiliensis  | USA        | 2016 |
| KY820802 | Alphacoronavirus | Myotis lucifugus       | Canada     | 2010 |
| KY820795 | Alphacoronavirus | Myotis lucifugus       | Canada     | 2010 |
| KY820794 | Alphacoronavirus | Myotis lucifugus       | Canada     | 2010 |
| KY820791 | Alphacoronavirus | Myotis lucifugus       | Canada     | 2010 |
| KY820788 | Alphacoronavirus | Myotis lucifugus       | Canada     | 2010 |
| KY820785 | Alphacoronavirus | Myotis lucifugus       | Canada     | 2010 |
| KY820779 | Alphacoronavirus | Myotis lucifugus       | Canada     | 2010 |
| KY820778 | Alphacoronavirus | Myotis lucifugus       | Canada     | 2010 |
| KY820774 | Alphacoronavirus | Myotis lucifugus       | Canada     | 2010 |
| KY820773 | Alphacoronavirus | Myotis lucifugus       | Canada     | 2010 |
| KY820770 | Alphacoronavirus | Myotis lucifugus       | Canada     | 2010 |
| OL415262 | Alphacoronavirus | Eptesicus fuscus       | USA        | 2021 |
| JQ731777 | Alphacoronavirus | Anoura geoffroyi       | Costa Rica | 2010 |
| KM215147 | Alphacoronavirus | Carollia castanea      | Costa Rica | 2014 |
| KY820783 | Alphacoronavirus | Myotis lucifugus       | Canada     | 2010 |
| KY820780 | Alphacoronavirus | Myotis lucifugus       | Canada     | 2010 |
| KY820776 | Alphacoronavirus | Myotis lucifugus       | Canada     | 2010 |
| KY820772 | Alphacoronavirus | Myotis lucifugus       | Canada     | 2010 |
| KY820800 | Alphacoronavirus | Myotis lucifugus       | Canada     | 2010 |
| OL410607 | Alphacoronavirus | Eptesicus fuscus       | USA        | 2020 |
| OL410608 | Alphacoronavirus | Eptesicus fuscus       | USA        | 2020 |
| JQ731787 | Alphacoronavirus | Artibeus lituratus     | Panama     | 2010 |
| EF544566 | Alphacoronavirus | Eptesicus fuscus       | USA        | 2006 |
| KY820767 | Alphacoronavirus | Myotis lucifugus       | Canada     | 2010 |
| KY820807 | Alphacoronavirus | Myotis lucifugus       | Canada     | 2010 |
| KY820801 | Alphacoronavirus | Myotis lucifugus       | Canada     | 2010 |
| KY820796 | Alphacoronavirus | Myotis lucifugus       | Canada     | 2010 |
| KY820789 | Alphacoronavirus | Myotis lucifugus       | Canada     | 2010 |
| KY820768 | Alphacoronavirus | Myotis lucifugus       | Canada     | 2010 |
| JQ731775 | Alphacoronavirus | Anoura geoffroyi       | Costa Rica | 2010 |
| JQ731778 | Alphacoronavirus | Anoura geoffroyi       | Costa Rica | 2010 |
| KC779226 | Alphacoronavirus | Artibeus jamaicensis   | Costa Rica | 2012 |
| KF430219 | Alphacoronavirus | Myotis lucifugus       | USA        | 2006 |
| KY820804 | Alphacoronavirus | Myotis lucifugus       | Canada     | 2010 |
| KY820798 | Alphacoronavirus | Myotis lucifugus       | Canada     | 2010 |
| KY820797 | Alphacoronavirus | Myotis lucifugus       | Canada     | 2010 |
| KY820787 | Alphacoronavirus | Myotis lucifugus       | Canada     | 2010 |
| KY820786 | Alphacoronavirus | Myotis lucifugus       | Canada     | 2010 |
| KY820781 | Alphacoronavirus | Myotis lucifugus       | Canada     | 2010 |
| OL410609 | Alphacoronavirus | Eptesicus fuscus       | USA        | 2020 |
| OL410610 | Alphacoronavirus | Eptesicus fuscus       | USA        | 2021 |
| JQ731786 | Alphacoronavirus | Artibeus jamaicensis   | Panama     | 2010 |
| JQ731791 | Alphacoronavirus | Carollia perspicillata | Costa Rica | 2010 |
| KY820790 | Alphacoronavirus | Myotis lucifugus       | Canada     | 2010 |
| KY820771 | Alphacoronavirus | Myotis lucifugus       | Canada     | 2010 |
| MT734810 | Alphacoronavirus | Myotis yumanensis      | USA        | 2020 |
| JQ731795 | Alphacoronavirus | Carollia brevicauda    | Brazil     | 2009 |

|          |                  |                        |         |      |
|----------|------------------|------------------------|---------|------|
| JQ731797 | Alphacoronavirus | Carollia brevicauda    | Brazil  | 2009 |
| KU552078 | Alphacoronavirus | Cynomops planirostris  | Brazil  | 2014 |
| KT717392 | Alphacoronavirus | Sturnira lilium        | Brazil  | 2012 |
| KT717389 | Alphacoronavirus | Molossus rufus         | Brazil  | 2014 |
| KX094984 | Alphacoronavirus | Molossus molossus      | Brazil  | 2009 |
| KX285049 | Alphacoronavirus | Sturnira erythromos    | Bolivia | 2011 |
| MH974764 | Alphacoronavirus | Molossus rufus         | Brazil  | 2015 |
| MH974765 | Alphacoronavirus | Molossus rufus         | Brazil  | 2015 |
| MH974767 | Alphacoronavirus | Molossus rufus         | Brazil  | 2017 |
| MH974771 | Alphacoronavirus | Molossus rufus         | Brazil  | 2015 |
| MH974776 | Alphacoronavirus | Molossus rufus         | Brazil  | 2017 |
| MT671953 | Alphacoronavirus | Tadarida brasiliensis  | Brazil  | 2014 |
| MT671958 | Alphacoronavirus | Tadarida brasiliensis  | Brazil  | 2014 |
| MN872697 | Alphacoronavirus | Carollia perspicillata | Brazil  | 2012 |
| MN872700 | Alphacoronavirus | Carollia perspicillata | Brazil  | 2012 |
| KU552077 | Alphacoronavirus | Cynomops abrasus       | Brazil  | 2013 |
| KT717393 | Alphacoronavirus | Sturnira lilium        | Brazil  | 2012 |
| KX285056 | Alphacoronavirus | Carollia perspicillata | Brazil  | 2009 |
| MH974768 | Alphacoronavirus | Molossus molossus      | Brazil  | 2016 |
| MH974773 | Alphacoronavirus | Molossus molossus      | Brazil  | 2016 |
| MT671952 | Alphacoronavirus | Tadarida brasiliensis  | Brazil  | 2014 |
| MN872696 | Alphacoronavirus | Sturnira lilium        | Brazil  | 2012 |
| KT717384 | Alphacoronavirus | Carollia perspicillata | Brazil  | 2011 |
| KX285068 | Alphacoronavirus | Mesophylla macconnelli | Brazil  | 2011 |
| KX285069 | Alphacoronavirus | Carollia perspicillata | Brazil  | 2011 |
| MH974779 | Alphacoronavirus | Eptesicus sp.          | Brazil  | 2015 |
| MH974780 | Alphacoronavirus | Glossophaga soricina   | Brazil  | 2015 |
| MN872699 | Alphacoronavirus | Carollia perspicillata | Brazil  | 2012 |
| JQ731796 | Alphacoronavirus | Carollia perspicillata | Brazil  | 2009 |
| KU552075 | Alphacoronavirus | Cynomops abrasus       | Brazil  | 2013 |
| KX285047 | Alphacoronavirus | Carollia perspicillata | Bolivia | 2011 |
| KX285050 | Alphacoronavirus | Carollia perspicillata | Bolivia | 2011 |
| KX285061 | Alphacoronavirus | Sturnira lilium        | Brazil  | 2010 |
| KX285062 | Alphacoronavirus | Artibeus lituratus     | Brazil  | 2010 |
| MH974775 | Alphacoronavirus | Phyllostomus discolor  | Brazil  | 2016 |
| MH974777 | Alphacoronavirus | Molossus rufus         | Brazil  | 2017 |
| MH974778 | Alphacoronavirus | Molossus rufus         | Brazil  | 2015 |
| MT671955 | Alphacoronavirus | Tadarida brasiliensis  | Brazil  | 2014 |
| MW465544 | Alphacoronavirus | Desmodus rotundus      | Brazil  | 2019 |
| JQ731800 | Alphacoronavirus | Molossus currentium    | Brazil  | 2009 |
| JQ731798 | Alphacoronavirus | Carollia perspicillata | Brazil  | 2009 |
| KU552073 | Alphacoronavirus | Cynomops planirostris  | Brazil  | 2013 |
| KT717391 | Alphacoronavirus | Myotis riparius        | Brazil  | 2013 |
| KT717390 | Alphacoronavirus | Myotis nigricans       | Brazil  | 2013 |
| KX285054 | Alphacoronavirus | Lichonycteris obscura  | Brazil  | 2009 |
| KX285055 | Alphacoronavirus | Anoura caudifer        | Brazil  | 2009 |
| KX285224 | Alphacoronavirus | Artibeus planirostris  | Brazil  | 2011 |
| MH974772 | Alphacoronavirus | Phyllostomus discolor  | Brazil  | 2015 |
| MT671957 | Alphacoronavirus | Tadarida brasiliensis  | Brazil  | 2014 |
| MW249018 | Alphacoronavirus | Desmodus rotundus      | Peru    | 2016 |
| MW465545 | Alphacoronavirus | Desmodus rotundus      | Brazil  | 2019 |

|          |                  |                        |         |      |
|----------|------------------|------------------------|---------|------|
| KU552074 | Alphacoronavirus | Glossophaga soricina   | Brazil  | 2013 |
| KU552076 | Alphacoronavirus | Cynomops abrasus       | Brazil  | 2013 |
| KT717385 | Alphacoronavirus | Carollia perspicillata | Brazil  | 2012 |
| KX094982 | Alphacoronavirus | Molossus molossus      | Brazil  | 2011 |
| KX285048 | Alphacoronavirus | Carollia perspicillata | Bolivia | 2011 |
| KX285058 | Alphacoronavirus | Glossophaga soricina   | Brazil  | 2009 |
| KX285060 | Alphacoronavirus | Sturnira lilium        | Brazil  | 2010 |
| KX285063 | Alphacoronavirus | Glossophaginae sp.     | Brazil  | 2010 |
| MH974769 | Alphacoronavirus | Molossus rufus         | Brazil  | 2015 |
| MH974770 | Alphacoronavirus | Molossus rufus         | Brazil  | 2015 |
| MN872698 | Alphacoronavirus | Carollia perspicillata | Brazil  | 2012 |
| JQ731799 | Alphacoronavirus | Molossus rufus         | Brazil  | 2009 |
| KU552072 | Alphacoronavirus | Desmodus rotundus      | Brazil  | 2013 |
| KT717380 | Alphacoronavirus | Artibeus lituratus     | Brazil  | 2010 |
| KT717388 | Alphacoronavirus | Molossus rufus         | Brazil  | 2013 |
| KT717382 | Alphacoronavirus | Artibeus lituratus     | Brazil  | 2012 |
| KT717394 | Alphacoronavirus | Sturnira lilium        | Brazil  | 2012 |
| KT717387 | Alphacoronavirus | Glossophaga soricina   | Brazil  | 2014 |
| KX285057 | Alphacoronavirus | Carollia perspicillata | Brazil  | 2009 |
| KX285059 | Alphacoronavirus | Sturnira lilium        | Brazil  | 2010 |
| MH974774 | Alphacoronavirus | Phyllostomus discolor  | Brazil  | 2016 |
| MT671954 | Alphacoronavirus | Tadarida brasiliensis  | Brazil  | 2014 |
| MN872694 | Alphacoronavirus | Artibeus planirostris  | Brazil  | 2012 |
| JQ731794 | Alphacoronavirus | Carollia perspicillata | Brazil  | 2009 |
| KC886321 | Alphacoronavirus | Molossus rufus         | Brazil  | 2010 |
| KU552079 | Alphacoronavirus | Cynomops planirostris  | Brazil  | 2014 |
| KT717383 | Alphacoronavirus | Carollia perspicillata | Brazil  | 2011 |
| KX285053 | Alphacoronavirus | Anoura caudifer        | Brazil  | 2009 |
| MH974766 | Alphacoronavirus | Eptesicus sp.          | Brazil  | 2015 |
| MT671956 | Alphacoronavirus | Tadarida brasiliensis  | Brazil  | 2005 |
| MN872693 | Alphacoronavirus | Artibeus planirostris  | Brazil  | 2012 |
| MN872695 | Alphacoronavirus | Artibeus lituratus     | Brazil  | 2012 |
| KM514667 | Alphacoronavirus | Tadarida brasiliensis  | Brazil  | 2011 |
| OM265165 | Alphacoronavirus | Artibeus lituratus     | Brazil  | 2021 |
| OM265166 | Alphacoronavirus | Artibeus lituratus     | Brazil  | 2021 |
| OM265167 | Alphacoronavirus | Artibeus lituratus     | Brazil  | 2021 |
| OM265168 | Alphacoronavirus | Artibeus lituratus     | Brazil  | 2021 |
| OM265169 | Alphacoronavirus | Artibeus lituratus     | Brazil  | 2021 |
| OM265170 | Alphacoronavirus | Artibeus lituratus     | Brazil  | 2021 |
| OM265171 | Alphacoronavirus | Carollia perspicillata | Brazil  | 2021 |
| OM265172 | Alphacoronavirus | Carollia perspicillata | Brazil  | 2021 |
| OM265173 | Alphacoronavirus | Carollia perspicillata | Brazil  | 2021 |
| OM265174 | Alphacoronavirus | Carollia perspicillata | Brazil  | 2021 |
| OM265175 | Alphacoronavirus | Carollia perspicillata | Brazil  | 2021 |
| OM265176 | Alphacoronavirus | Carollia perspicillata | Brazil  | 2021 |
| OM265177 | Alphacoronavirus | Carollia perspicillata | Brazil  | 2021 |
| OM265178 | Alphacoronavirus | Carollia perspicillata | Brazil  | 2021 |
| OM265179 | Alphacoronavirus | Carollia perspicillata | Brazil  | 2021 |
| OM265180 | Alphacoronavirus | Artibeus cinereus      | Brazil  | 2021 |
| OM265181 | Alphacoronavirus | Diphylla ecaudata      | Brazil  | 2021 |
| OM265182 | Alphacoronavirus | Sturnira lilium        | Brazil  | 2021 |

|          |                  |                       |        |      |
|----------|------------------|-----------------------|--------|------|
| OM265183 | Alphacoronavirus | Phyllostomus hastatus | Brazil | 2021 |
| OM265184 | Alphacoronavirus | Phyllostomus discolor | Brazil | 2021 |
| OM265185 | Alphacoronavirus | Phyllostomus discolor | Brazil | 2021 |
| OM265186 | Alphacoronavirus | Phyllostomus discolor | Brazil | 2021 |
| OM265187 | Alphacoronavirus | Phyllostomus discolor | Brazil | 2021 |
| OM265188 | Alphacoronavirus | Phyllostomus discolor | Brazil | 2021 |
| OM265189 | Alphacoronavirus | Phyllostomus discolor | Brazil | 2021 |
| OM265190 | Alphacoronavirus | Phyllostomus discolor | Brazil | 2021 |
| OM265191 | Alphacoronavirus | Phyllostomus discolor | Brazil | 2021 |
| OM265192 | Alphacoronavirus | Phyllostomus discolor | Brazil | 2021 |
| OM265193 | Alphacoronavirus | Phyllostomus discolor | Brazil | 2021 |
| OM265194 | Alphacoronavirus | Phyllostomus discolor | Brazil | 2021 |
| OM265195 | Alphacoronavirus | Phyllostomus discolor | Brazil | 2021 |
| OM265196 | Alphacoronavirus | Phyllostomus discolor | Brazil | 2021 |
| OM265197 | Alphacoronavirus | Phyllostomus discolor | Brazil | 2021 |
| OM265198 | Alphacoronavirus | Sturnira lilium       | Brazil | 2021 |
| OM265199 | Alphacoronavirus | Sturnira lilium       | Brazil | 2021 |
| OM265200 | Alphacoronavirus | Sturnira lilium       | Brazil | 2021 |
| OM265201 | Alphacoronavirus | Sturnira lilium       | Brazil | 2021 |
| OM265202 | Alphacoronavirus | Sturnira lilium       | Brazil | 2021 |
| OM265204 | Alphacoronavirus | Sturnira lilium       | Brazil | 2021 |
| OM265203 | Alphacoronavirus | Sturnira lilium       | Brazil | 2021 |
| OM265205 | Alphacoronavirus | Sturnira lilium       | Brazil | 2021 |
| OM265206 | Alphacoronavirus | Sturnira lilium       | Brazil | 2020 |
| OM265207 | Alphacoronavirus | Sturnira lilium       | Brazil | 2020 |
| OM265208 | Alphacoronavirus | Sturnira lilium       | Brazil | 2020 |

**Clade A**

|                    | PD     | SR |
|--------------------|--------|----|
| <i>Molossus</i>    | 247.71 | 18 |
| <i>Eptesicus</i>   | 221.17 | 9  |
| <i>Glossophaga</i> | 85.02  | 1  |
| <i>Tadarida</i>    | 91.77  | 3  |

| <b>MPD</b>         | ntaxa | mpd.obs | mpd.rand.mean | mpd.rand.sd | mpd.obs.rank | mpd.obs.z | mpd.obs.p | runs |
|--------------------|-------|---------|---------------|-------------|--------------|-----------|-----------|------|
| <i>Molossus</i>    | 18    | 46.580  | 105.300       | 9.282       | 1.000        | -6.326    | 0.001     | 1000 |
| <i>Eptesicus</i>   | 9     | 82.602  | 105.239       | 17.524      | 110.000      | -1.292    | 0.110     | 1000 |
| <i>Glossophaga</i> | 1     | NA      | NaN           | NA          | NA           | NA        | NA        | 1000 |
| <i>Tadarida</i>    | 3     | 1.529   | 104.518       | 44.306      | 2.000        | -2.324    | 0.002     | 1000 |

| <b>MNTD</b>        | ntaxa | mntd.obs | mntd.rand.mean | mntd.rand.sd | mntd.obs.rank | mntd.obs.z | mntd.obs.p | runs |
|--------------------|-------|----------|----------------|--------------|---------------|------------|------------|------|
| <i>Molossus</i>    | 18    | 9.452    | 15.193         | 5.204        | 139.000       | -1.103     | 0.139      | 1000 |
| <i>Eptesicus</i>   | 9     | 12.751   | 26.989         | 11.700       | 142.000       | -1.217     | 0.142      | 1000 |
| <i>Glossophaga</i> | 1     | NA       | NaN            | NA           | NA            | NA         | NA         | 1000 |
| <i>Tadarida</i>    | 3     | 1.196    | 72.400         | 36.361       | 4.000         | -1.958     | 0.004      | 1000 |

## Phylogenetic Beta Diversity

|                    | <i>Molossus</i> | <i>Eptesicus</i> | <i>Glossophaga</i> |
|--------------------|-----------------|------------------|--------------------|
| <i>Eptesicus</i>   | 140.10          |                  |                    |
| <i>Glossophaga</i> | 30.62           | 134.06           |                    |
| <i>Tadarida</i>    | 175.10          | 128.94           | 175.38             |

**Clade B**

|                   | PD     | SR |
|-------------------|--------|----|
| <i>Tadarida</i>   | 101.03 | 20 |
| <i>Myotis</i>     | 307.02 | 26 |
| <i>Perimyotis</i> | 59.19  | 1  |
| <i>Cynomops</i>   | 74.91  | 6  |
| <i>Molossus</i>   | 69.50  | 3  |

| <b>MPD</b>        | ntaxa | mpd.obs | mpd.rand.mean | mpd.rand.sd | mpd.obs.rank | mpd.obs.z | mpd.obs.p | runs |
|-------------------|-------|---------|---------------|-------------|--------------|-----------|-----------|------|
| <i>Tadarida</i>   | 20    | 15.198  | 80.093        | 5.151       | 1.000        | -12.597   | 0.001     | 1000 |
| <i>Myotis</i>     | 26    | 44.253  | 80.012        | 3.853       | 1.000        | -9.281    | 0.001     | 1000 |
| <i>Perimyotis</i> | 1     | NA      | NaN           | NA          | NA           | NA        | NA        | 1000 |
| <i>Cynomops</i>   | 6     | 6.957   | 79.497        | 15.946      | 2.000        | -4.549    | 0.002     | 1000 |
| <i>Molossus</i>   | 3     | 0.366   | 77.872        | 30.903      | 1.000        | -2.508    | 0.001     | 1000 |

| <b>MNTD</b>       | ntaxa | mntd.obs | mntd.rand.mean | mntd.rand.sd | mntd.obs.rank | mntd.obs.z | mntd.obs.p | runs |
|-------------------|-------|----------|----------------|--------------|---------------|------------|------------|------|
| <i>Tadarida</i>   | 20    | 1.611    | 10.652         | 4.697        | 1.000         | -1.925     | 0.001      | 1000 |
| <i>Myotis</i>     | 26    | 11.729   | 8.826          | 3.276        | 799.000       | 0.886      | 0.798      | 1000 |
| <i>Perimyotis</i> | 1     | NA       | NaN            | NA           | NA            | NA         | NA         | 1000 |
| <i>Cynomops</i>   | 6     | 3.800    | 26.367         | 16.176       | 54.000        | -1.395     | 0.054      | 1000 |
| <i>Molossus</i>   | 3     | 0.265    | 54.643         | 31.708       | 1.000         | -1.715     | 0.001      | 1000 |

## Phylogenetic Beta Diversity

|                   | <i>Tadarida</i> | <i>Myotis</i> | <i>Perimyotis</i> | <i>Cynomops</i> |
|-------------------|-----------------|---------------|-------------------|-----------------|
| <i>Myotis</i>     | 113.95          |               |                   |                 |
| <i>Perimyotis</i> | 118.23          | 61.68         |                   |                 |
| <i>Cynomops</i>   | 100.96          | 113.91        | 113.77            |                 |
| <i>Molossus</i>   | 12.59           | 115.68        | 120.43            | 103.16          |

**Supplementary Table S3.** Phylogenetic diversity results. Metrics of CoV phylogenetic diversity within each bat genus for clades A and B. Phylogenetic diversity (PD); species richness (SR); standardized effect size of mean phylogenetic distance (SES MPD); standardized effect size of mean nearest taxon distance (SES MNTD); and phylogenetic beta diversity (among bat genera) are shown. The SES values were calculated by randomly reshuffling tip labels 1000 times along the entire phylogeny.
